# Supplementary material for: Tin(II) and Tin(IV) Complexes Incorporating the Oxygen Tripodal Ligands [(η5-C5R5)Co{P(OEt)2O}3]−, (R = H, Me; Et = -C2H5) as Potent Inflammatory Mediator Inhibitors: Cytotoxic Properties and Biological Activities against the Platelet-Activating Factor (PAF) and Thrombin
Source: MDPI journal article supplement (doi:10.3390/molecules28041859), 2023-02-16
Supplement: s1 [file s1]

# Supplementary material

For

**Tin(II) and tin(IV) complexes incorporating the oxygen tripodal ligand  $[(\eta^5\text{-C}_5\text{R}_5)\text{Co}\{\text{P}(\text{OEt})_2\text{O}\}_3]^-$ , (R = H, Me; Et =  $-\text{C}_2\text{H}_5$ ): Cytotoxic properties and biological activities against the Platelet-Activating Factor (PAF) and Thrombin**

Alexandros Kalampalidis <sup>1</sup>, Artemis Damati <sup>2,3</sup>, Demetrios Matthopoulos <sup>2</sup>, Alexandros B. Tsoupras <sup>4,5,6</sup>, Constantinos Demopoulos <sup>7</sup>, Gregor Schnakenburg <sup>8</sup>, and Athanassios Philippopoulos <sup>1,\*</sup>

<sup>1</sup> Laboratory of Inorganic Chemistry, Department of Chemistry, National and Kapodistrian University of Athens, Panepistimiopolis Zografou 15771, Athens, Greece

<sup>2</sup> Department of Environmental Engineering. School of Engineering. University of Patras, Greece

<sup>3</sup> Department of Forestry and Environment Natural Management. School of Plant Sciences, Agricultural University of Athens, Greece

<sup>4</sup> Department of Biological Sciences, University of Limerick, Limerick V94 T9PX, Ireland

<sup>5</sup> Health Research Institute, University of Limerick, Limerick V94 T9PX, Ireland

<sup>6</sup> Bernal Institute, University of Limerick, Limerick V94 T9PX, Ireland

<sup>7</sup> Laboratory of Biochemistry, Department of Chemistry, National and Kapodistrian University of Athens, Panepistimiopolis Zografou 15771, Athens, Greece

<sup>8</sup>Institut für Anorganische Chemie, Rheinische Friedrich-Wilhelms-Universität Bonn, Gerhard-Domagk-Straße 1, D-53121 Bonn, Germany

\* Corresponding author: Prof. A. I. Philippopoulos. Tel.: +30-210-7274697; e-mail: atphilip@chem.uoa.gr

## Table of Contents

| Entry          |                                                                                                                                         |
|----------------|-----------------------------------------------------------------------------------------------------------------------------------------|
| 1) Figure S1   | FT-IR (ATR mode) spectrum of <b>2a</b>                                                                                                  |
| 2) Figure S2   | FT-IR (ATR mode) spectrum of <b>2b</b>                                                                                                  |
| 3) Table S1    | Selected bond lengths (pm) and bond angles (°) with estimated standard deviations for complexes for <b>2a</b> , <b>2b</b> and <b>3b</b> |
| 4) Figure S3   | Hydrogen bonding interactions in <b>2a</b>                                                                                              |
| 5) Figure S4   | Hydrogen bonding interactions in <b>2b</b>                                                                                              |
| 6) Figure S5   | FT-IR spectra of <b>3a</b>                                                                                                              |
| 7) Figure S6   | FT-IR spectra of <b>3b</b>                                                                                                              |
| 8) Figure S7   | <sup>1</sup> H NMR of <b>3a</b> in CDCl <sub>3</sub>                                                                                    |
| 9) Figure S8   | <sup>31</sup> P NMR of <b>3a</b> in CDCl <sub>3</sub>                                                                                   |
| 10) Figure S9  | <sup>1</sup> H NMR of <b>3b</b> in CDCl <sub>3</sub>                                                                                    |
| 11) Figure S10 | <sup>31</sup> P NMR data of <b>3b</b> in CDCl <sub>3</sub>                                                                              |
| 12) Figure S11 | C–H⋯π interactions in <b>3b</b>                                                                                                         |
| 13) Figure S12 | <sup>1</sup> H NMR spectrum of <b>2a</b> recorded in DMSO-d <sub>6</sub>                                                                |
| 14) Figure S13 | <sup>1</sup> H NMR spectrum of <b>2b</b> recorded in DMSO-d <sub>6</sub>                                                                |
| 15) Figure S14 | <sup>1</sup> H NMR spectrum of <b>3a</b> recorded in DMSO-d <sub>6</sub>                                                                |
| 16) Figure S15 | <sup>31</sup> P NMR spectrum of <b>3a</b> recorded in DMSO-d <sub>6</sub>                                                               |
| 17) Table S2   | Viability percentage (%) values for organotin(II) and organotin(IV) complexes against the Jurkat T lymphoblastic tumor cell line        |
| 18) entry      | Molecular docking Studies                                                                                                               |
| 19) entry      | Details of the experimental protocol for biological experiments on washed rabbit platelets (WRPs)                                       |

# 1) Table S1

Selected bond lengths (pm) and bond angles (°) with estimated standard deviations for complexes **2a**, **2b** and **3b**.

|                     | <b>2a</b>               | <b>2b</b>  | <b>3b</b>  |                    | <b>2a</b>  | <b>2b</b>  | <b>3b</b>  |
|---------------------|-------------------------|------------|------------|--------------------|------------|------------|------------|
| <i>Bond lengths</i> |                         |            |            | <i>Bond angles</i> |            |            |            |
| Sn–Cl               | 258.47(10) <sup>a</sup> | 262.4(2)   |            | Cl–Sn–O(1)         | 86.96(6)   | 84.90(14)  |            |
| Sn–O(1)             | 213.8(2)                | 210.2(4)   | 220.6(5)   | Cl–Sn–O(2)         | 84.90(6)   | 87.20(14)  | 9          |
| Sn–O(2)             | 212.47(19)              | 212.0(4)   | 221.7(4)   | Cl–Sn–O(3)         | 157.85(5)  | 158.45(11) |            |
| Sn–O(3)             | 245.8(2)                | 238.6(5)   | 221.8(4)   | O(1)–Sn–O(2)       | 89.93(8)   | 88.89(16)  | 79.31(16)  |
| P(1)–O(1)           | 153.3(2)                | 153.9(4)   | 150.5(5)   | O(1)–Sn–O(3)       | 78.68(8)   | 78.43(17)  | 79.08(17)  |
| P(1)–O(4)           | 159.35(2)               | 161.6(5)   | 157.1(6)   | O(2)–Sn–O(3)       | 78.49(7)   | 78.99(16)  | 78.31(16)  |
| P(1)–O(5)           | 159.7(2)                | 159.7(4)   | 158.0(7)   | P(1)–O(1)–Sn       | 132.10(12) | 137.5(3)   | 135.5(3)   |
| P(2)–O(2)           | 152.76(19)              | 153.6(4)   | 149.8(5)   | P(2)–O(2)–Sn       | 135.56(12) | 132.6(2)   | 136.2(3)   |
| P(2)–O(6)           | 159.25(2)               | 159.4(5)   | 157.8(5)   | P(3)–O(3)–Sn       | 128.58(12) | 132.1(3)   | 136.3(3)   |
| P(2)–O(7)           | 160.85(2)               | 160.6(5)   | 159.4(6)   | Co–P(1)–O(1)       | 119.36(9)  | 119.25(18) | 120.0(2)   |
| P(3)–O(3)           | 150.0(2)                | 150.8(4)   | 150.7(5)   | Co–P(1)–O(4)       | 109.55(11) | 115.35(19) | 109.4(3)   |
| P(3)–O(8)           | 160.25(3)               | 160.3(5)   | 157.5(7)   | Co–P(1)–O(5)       | 111.05(9)  | 107.89(19) | 109.3(2)   |
| P(3)–O(9)           | 159.3(2)                | 161.2(4)   | 157.4(7)   | Co–P(2)–O(2)       | 119.89(9)  | 121.61(15) | 120.32(19) |
| Co–P(1)             | 216.28(9)               | 218.39(18) | 216.1(2)   | Co–P(2)–O(6)       | 109.74(10) | 106.34(18) | 111.2(2)   |
| Co–P(2)             | 216.34(10)              | 217.73(17) | 215.68(19) | Co–P(2)–O(7)       | 110.72(11) | 113.8(2)   | 108.9(2)   |
| Co–P(3)             | 217.05(10)              | 219.13(19) | 216.7(2)   | Co–P(3)–O(3)       | 119.68(9)  | 119.3(2)   | 118.78(19) |
| Co–C(1)             | 207.15(4)               | 214.2(6)   | 209.0(8)   | Co–P(3)–O(8)       | 110.68(10) | 106.83(18) | 109.6(3)   |
| Co–C(2)             | 208.9(3)                | 215.1(6)   | 212.5(7)   | Co–P(3)–O(9)       | 104.16(10) | 111.7(2)   | 111.9(4)   |
| Co–C(3)             | 209.55(3)               | 212.0(7)   | 211.1(7)   | P(1)–Co–P(2)       | 93.08(4)   | 92.05(7)   | 90.50(7)   |
| Co–C(4)             | 207.7(4)                | 213.9(6)   | 211.0(7)   | P(1)–Co–P(3)       | 91.62(4)   | 87.99(7)   | 89.44(8)   |
| Co–C(5)             | 207.15(4)               | 212.1(6)   | 211.7(8)   | P(2)–Co–P(3)       | 90.52(4)   | 91.04(7)   | 130.4(2)   |

<sup>a</sup> Two crystallographically independent molecules are found in the crystal structure; the listed bond lengths and angles are the average values for the two molecules.

**General comment about the crystal structures reported in this work.**

The X-ray structures of **2a**, **2b** and **3b** have been measured some years ago. This to some extent, explains the limited quality of the structure determinations of **2b** and **3b**.

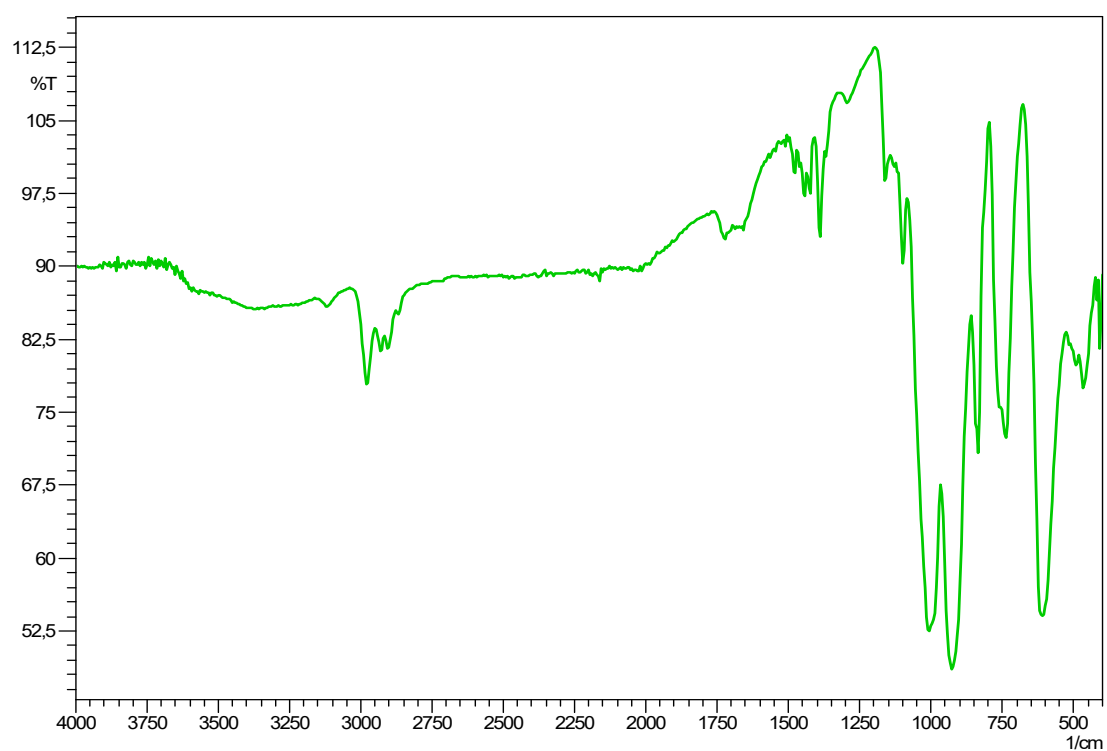

2) **Figure S1.** FT-IR (ATR mode) spectrum of **2a**

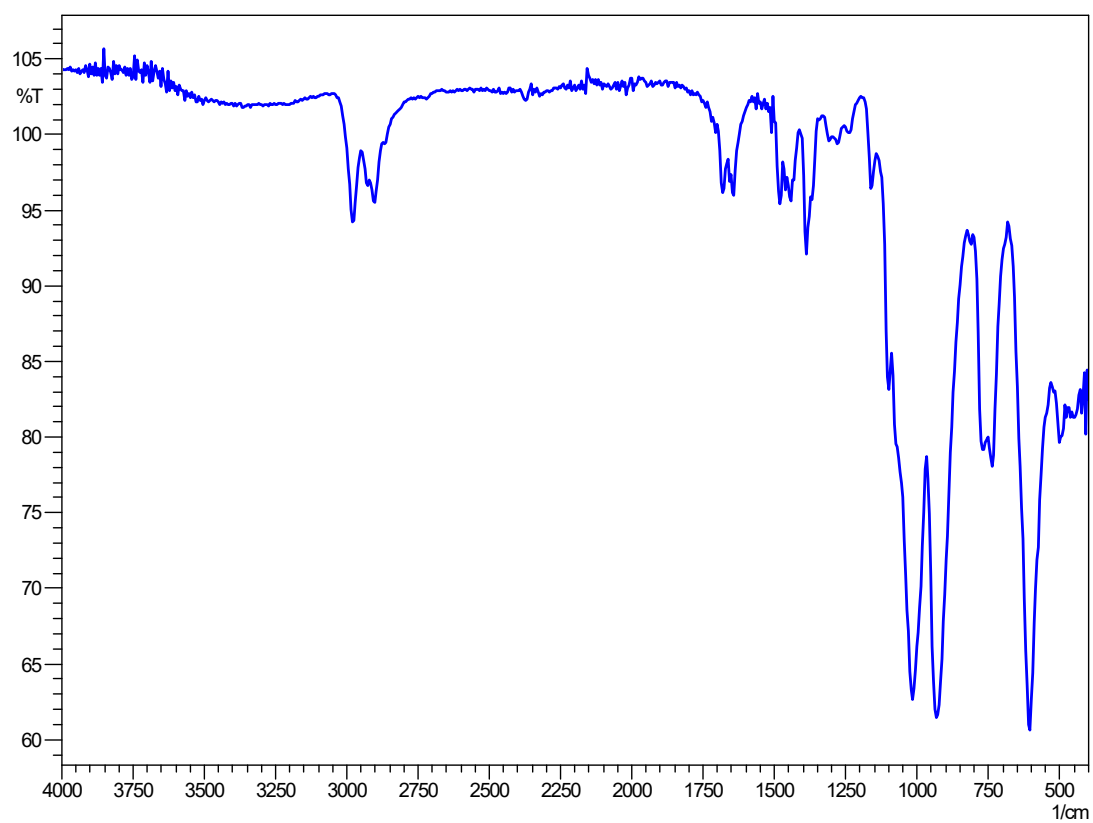

3) **Figure S2.** FT-IR (ATR mode) spectrum of **2b**

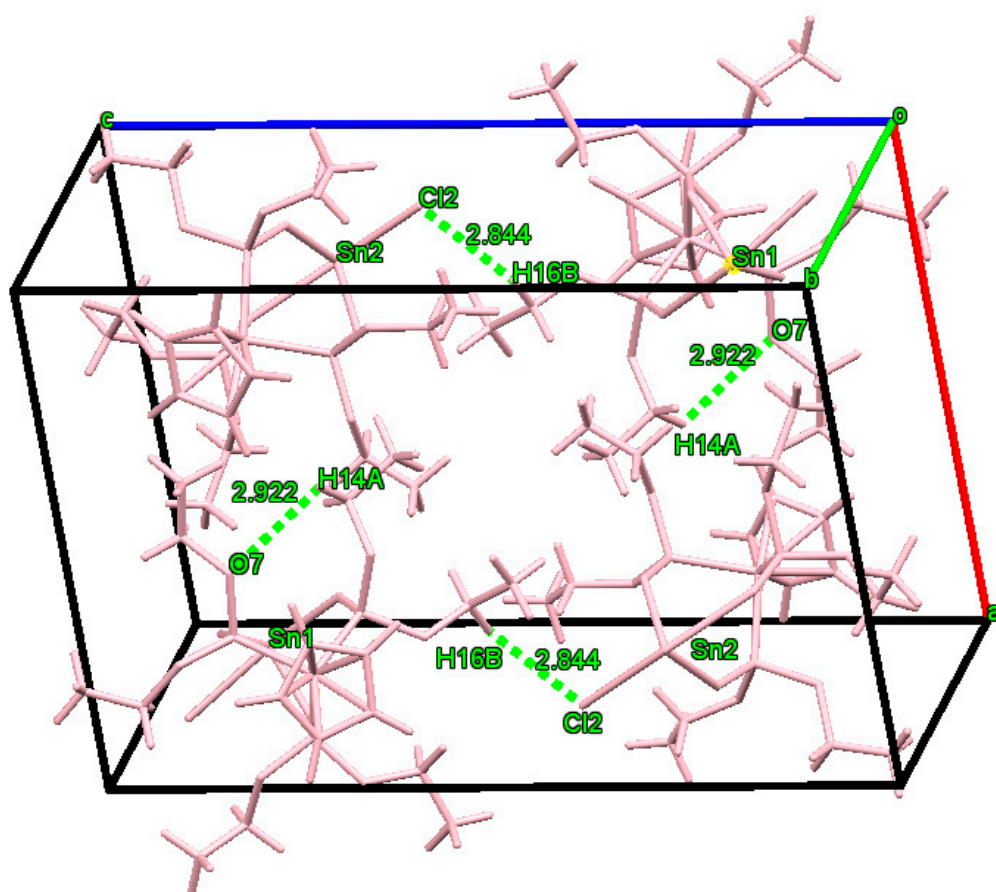

4) **Figure S3.** Hydrogen bonding interactions in **2a**

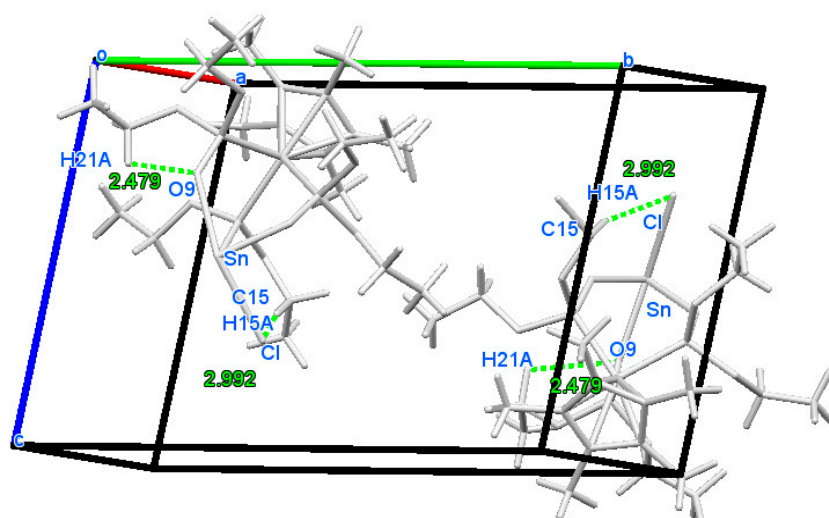

5) **Figure S4.** Hydrogen bonding interactions in **2b**

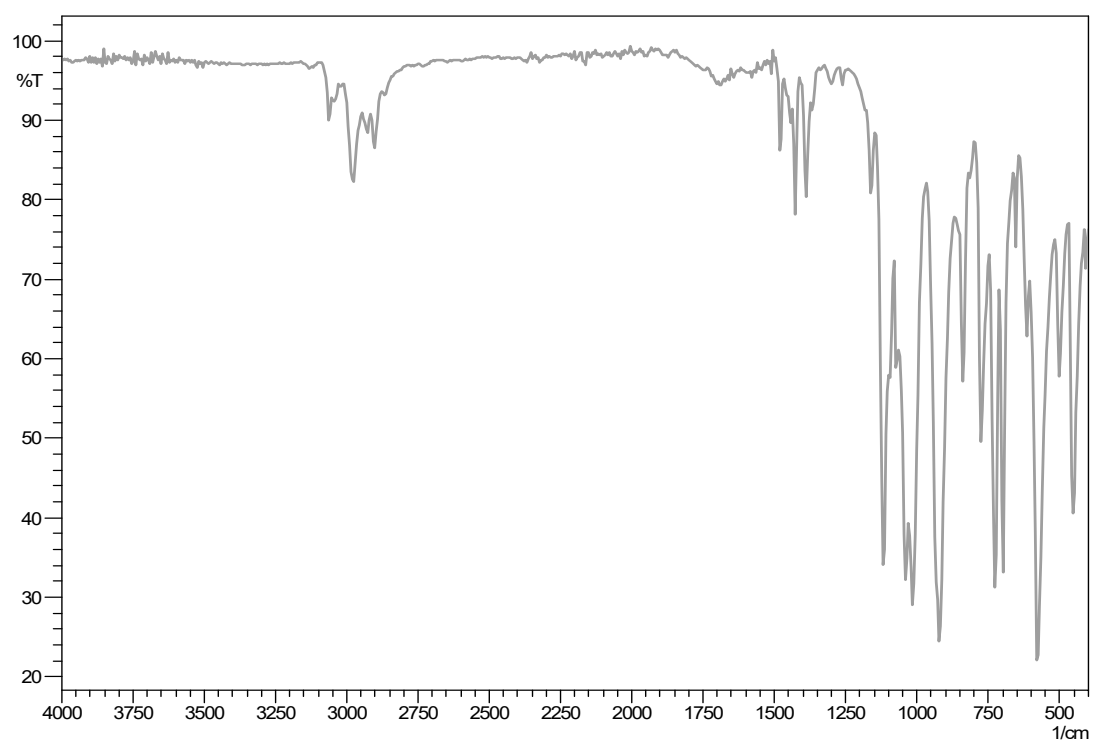

6) **Figure S5:** FT-IR spectra of **3a**

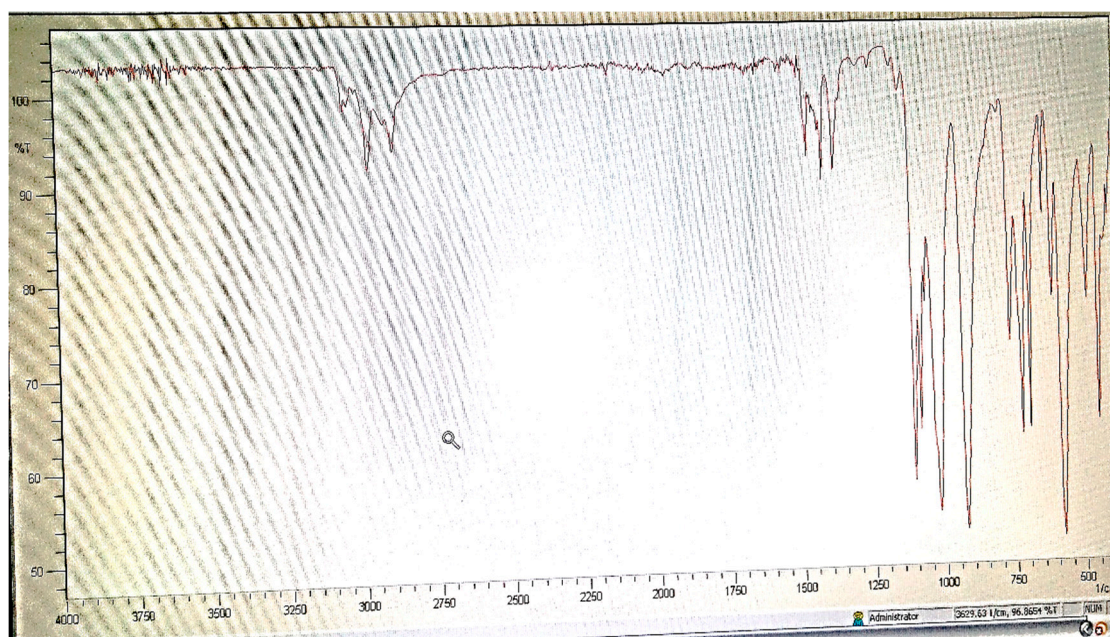

7) **Figure S6:** FT-IR spectra of **3b**

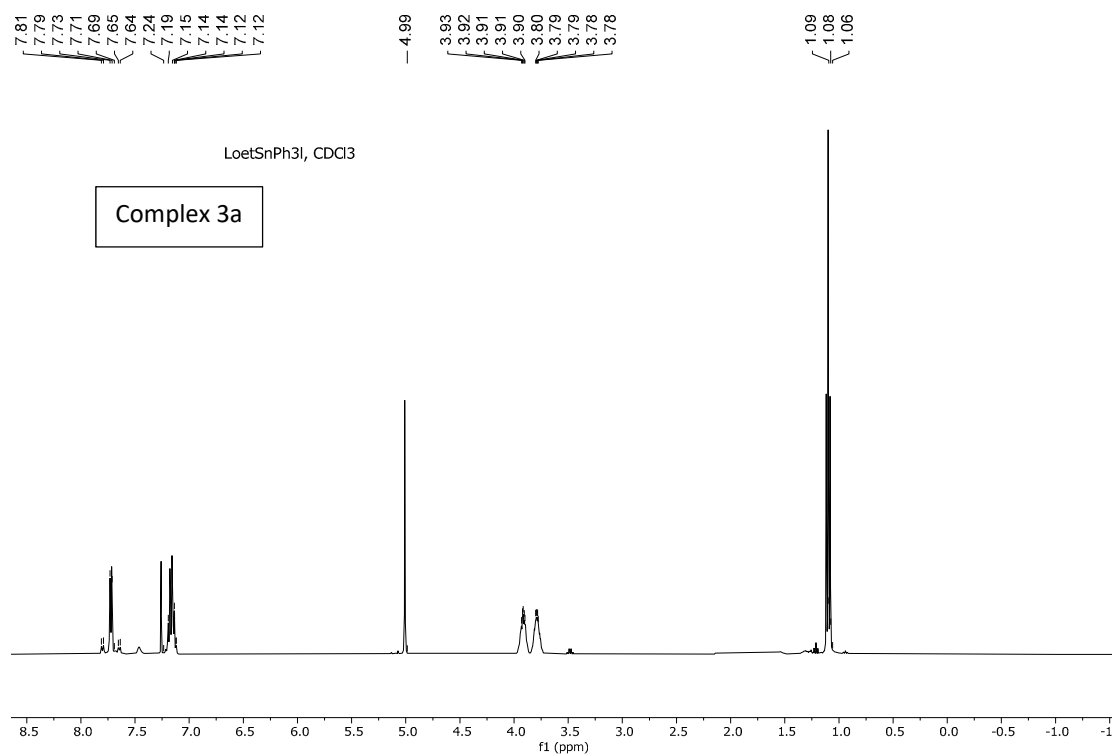

8) **Figure S7.**  $^1\text{H}$ -NMR of **3a** in  $\text{CDCl}_3$  (400 MHz)

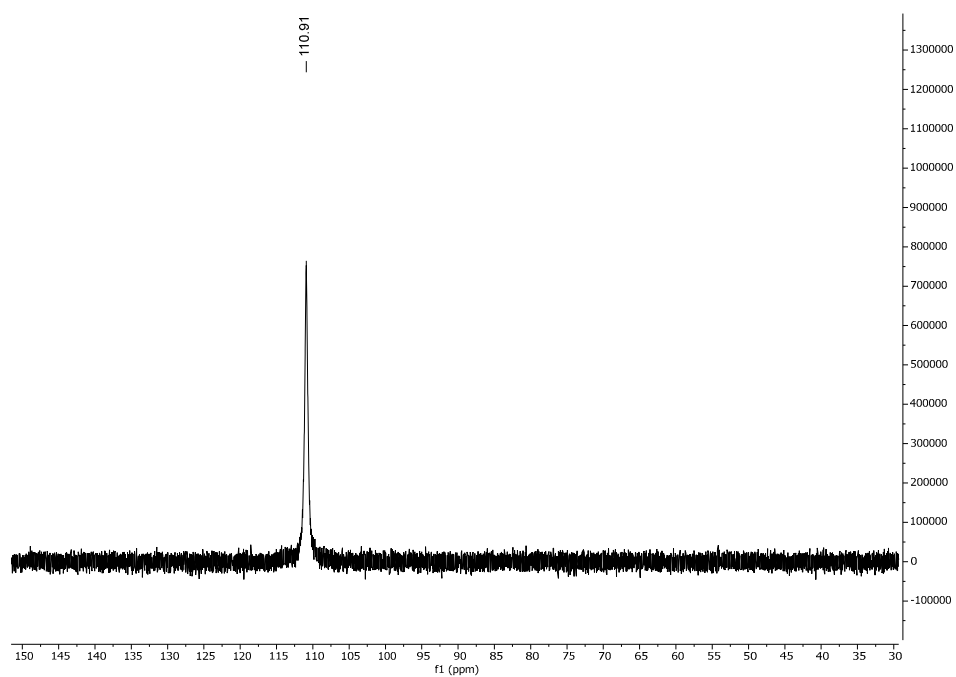

9) **Figure S8.**  $^{31}\text{P}$ -NMR of **3a** in  $\text{CDCl}_3$  (400 MHz)



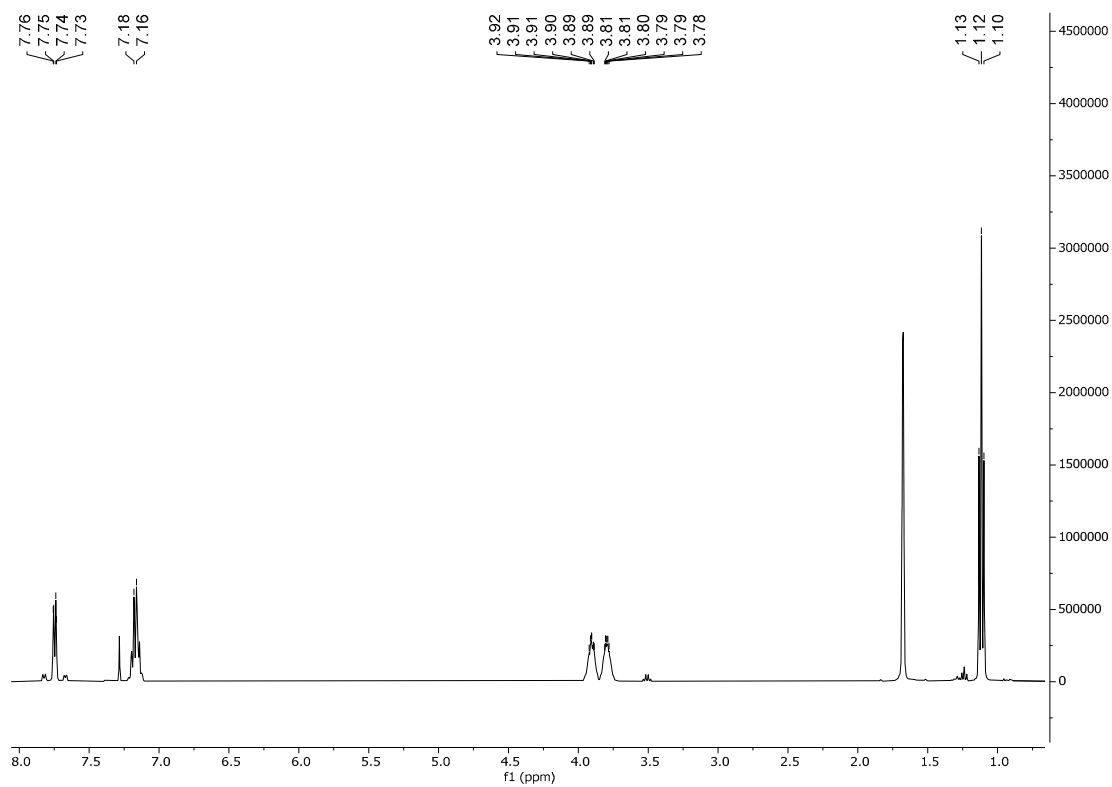

10) **Figure S9.**  $^1\text{H}$ -NMR of **3b** in  $\text{CDCl}_3$  (400 MHz)

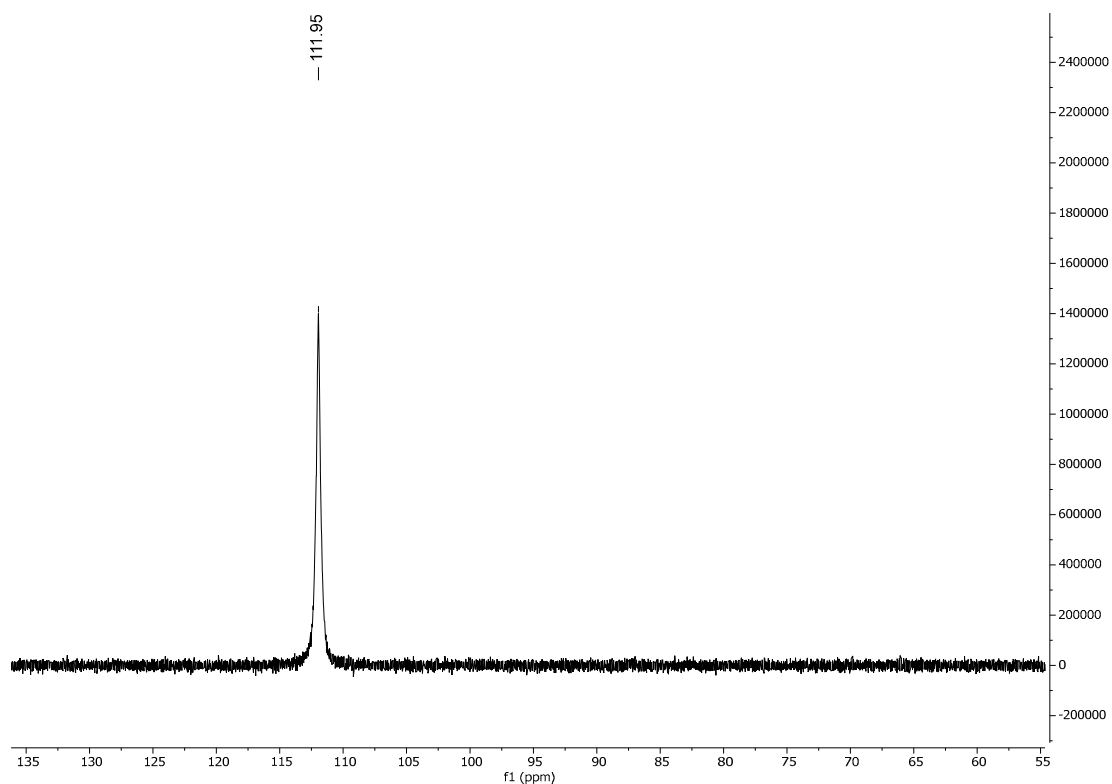

11) **Figure S10.**  $^{31}\text{P}$ -NMR of **3b** in  $\text{CDCl}_3$  (400 MHz)

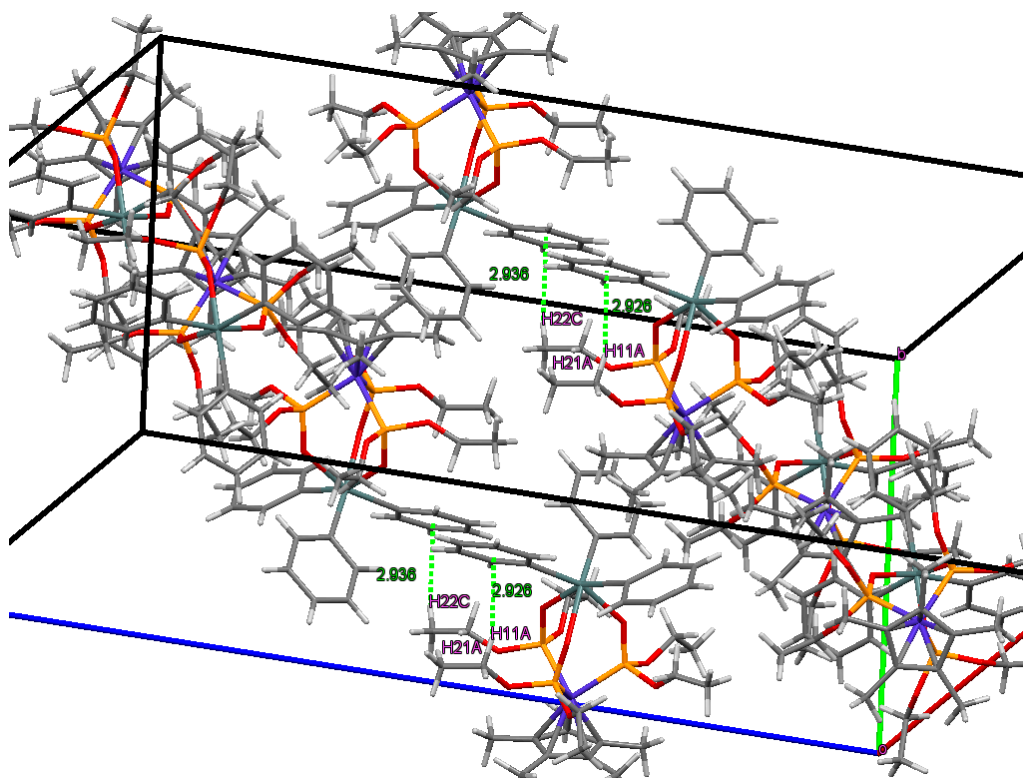

12) **Figure S11.** C–H $\cdots\pi$  interactions in **3b**

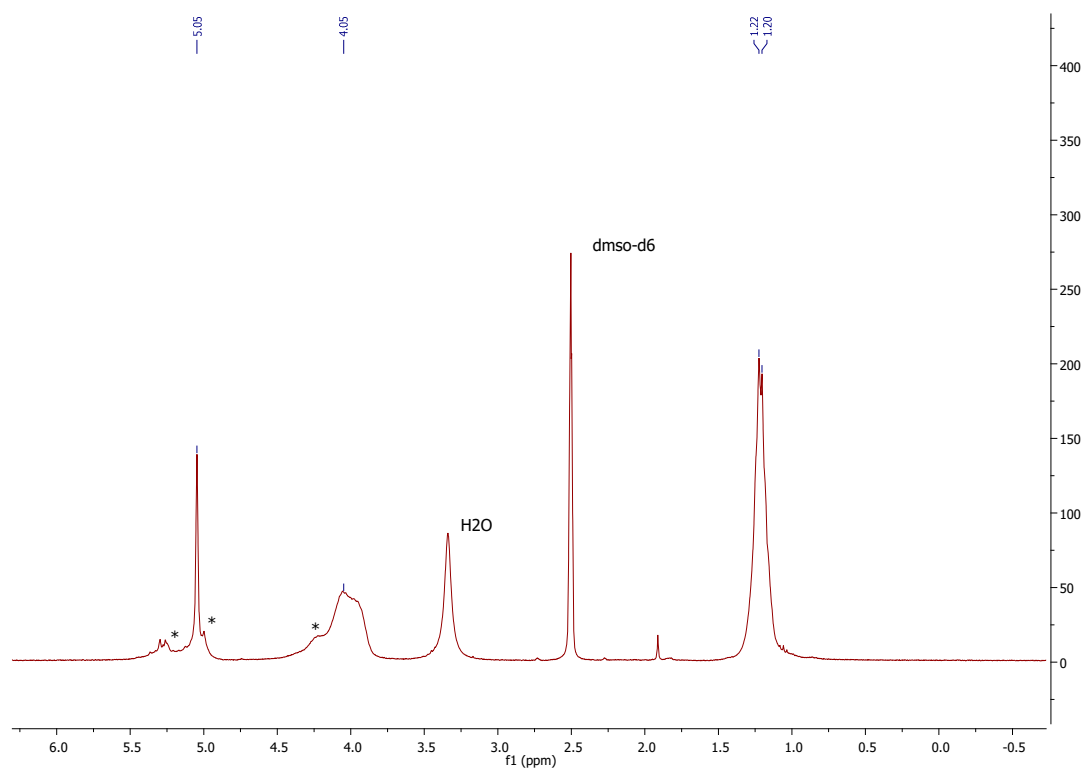

13) **Figure S12.**  $^1\text{H}$  NMR of **2a** in  $\text{dms0-d6}$ . Asterisks show the appearance of new species upon standing for hours in this solvent.

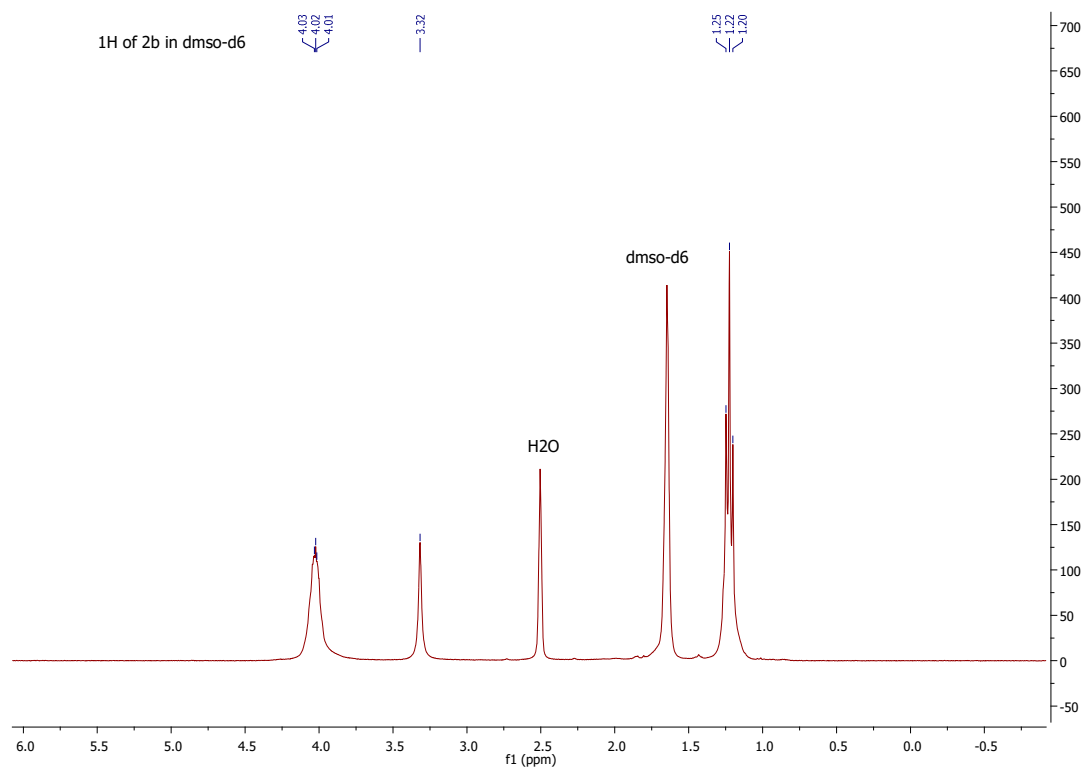

14) **Figure S13.** <sup>1</sup>H NMR of **2b** in dms<sub>o</sub>-d<sub>6</sub>.

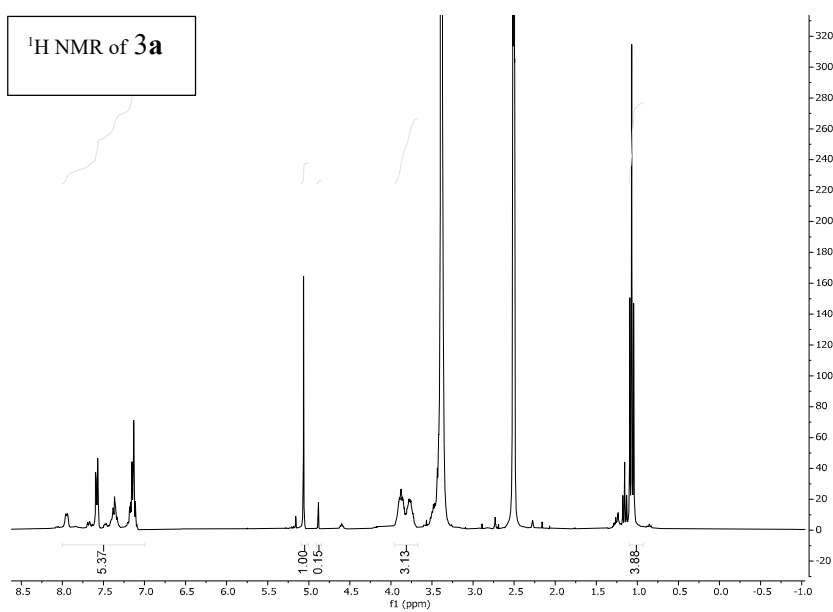

15) **Figure S14.** <sup>1</sup>H NMR spectrum of **3a** recorded in DMSO-d<sub>6</sub>.

<sup>31</sup>P NMR of **3a**

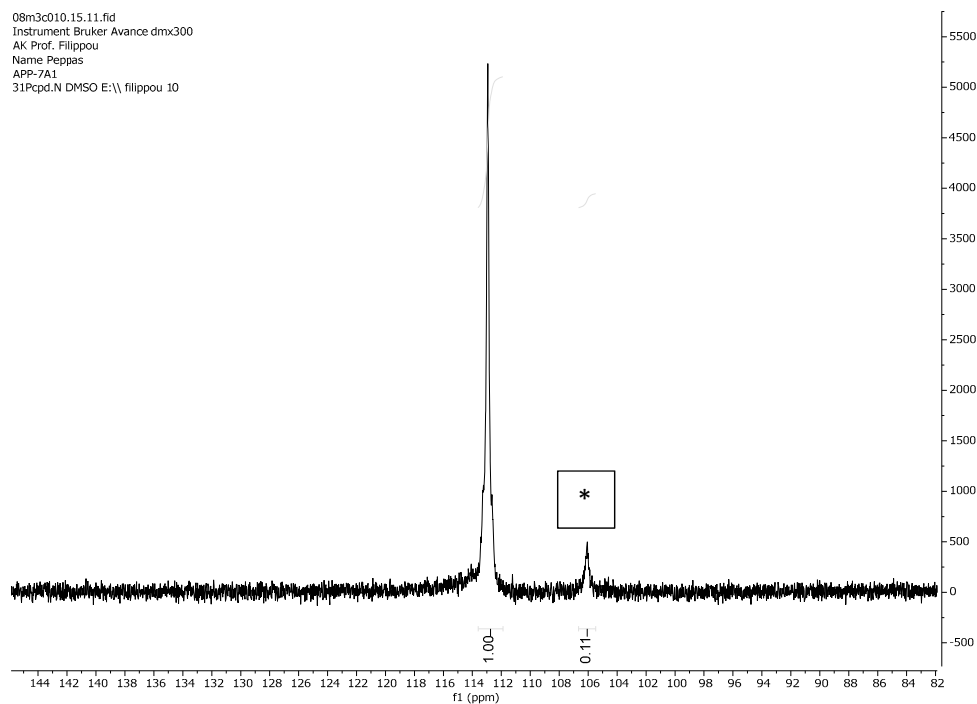

16) **Figure S15.**  $^{31}\text{P}$  NMR spectrum of **3a** recorded in  $\text{DMSO-d}_6$ . Asterisk shows the appearance of new species upon standing for hours in this solvent.

## 17) Table S2

**Table S2.** Viability percentage (%) values for organotin(II) and organotin(IV) complexes against the Jurkat T lymphoblastic tumor cell line

| Concentration<br>in $\mu\text{M}$ | Cisplatin | $\text{SnCl}_2 \cdot 2\text{H}_2\text{O}$ | $\text{Ph}_3\text{SnCl}$ | 1a     | 1b     | 2a     | 2b     | 3a     | 3b     |
|-----------------------------------|-----------|-------------------------------------------|--------------------------|--------|--------|--------|--------|--------|--------|
| 0                                 | 233.60    | 132.90                                    | 120.60                   | 170.60 | 219.90 | 187.20 | 154.30 | 229.60 | 198.30 |
| 1                                 | 50.40     | 153.80                                    | 5.80                     | 244    | 67.50  | 56.70  | 98.20  | 11.30  | 100    |
| 5                                 | 55.50     | 100.80                                    | 0                        | 361.30 | 68.20  | 49.40  | 53.60  | 7.50   | 73.50  |
| 10                                | 39.50     | 158.80                                    | 0                        | 229.40 | 67.70  | 54.50  | 6.30   | 6.30   | 65.20  |
| 20                                | 43.80     | 73.90                                     | 0                        | 152.80 | 87.70  | 48.10  | 4.40   | 0      | 48.80  |
| 50                                | 22.80     | 37.80                                     | 0                        | 235    | 99.10  | 53.80  | 0      | 0      | 22.60  |
| 75                                | 4.80      | 27.20                                     | 0                        | 128.80 | 102.30 | 39.90  | 0      | 0      | 19.10  |

## 18) Molecular docking Studies

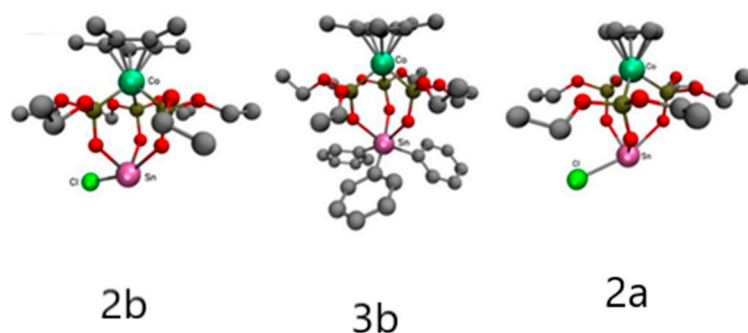

Molecular docking calculations were performed with the aim to obtain structural insights into the interaction of the organotin complexes with PAFR. Docking of the three complexes **2a**, **2b** and **3b** were performed as described in previously [1], revealing that none of the complexes can easily fit inside the PAF-binding site of the receptor. In particular, **3b** is predicted to exhibit the highest positive free energies of binding ( $> 100$  Kcal/mol) due to extended van der Waals clashes with PAFR. The less bulky complexes **2a** and **2b** still displayed positive free energies of binding, but in the order of 10-20 Kcal/mol, and 1-10 Kcal/mol, respectively. However, it should be noted that docking calculations were performed with a rigid model of the receptor. Therefore, a possible reorganization of the PAF-binding site residues might provide the space required to accommodate these complexes. In such case, complexes **2a** and **2b** shall be the most favorable due to the presence of the less bulky ligands. On the other hand, there is also a possibility that these complexes can interact with the extracellular domain of the receptor, thus inhibiting PAFR by blocking the entrance of PAF inside its receptor.

## 19) Details of the experimental protocol for biological experiments on washed rabbit platelets (WRPs)

More specifically, 250  $\mu$ L of washed rabbit platelets' suspensions were added to an aggregometer cuvette, at 37  $^{\circ}$ C, stirred at 1200 rpm, and calibrated prior to testing with a blank. The maximum-reversible (or the minimum-irreversible) PAF-induced/thrombin-induced platelet aggregation was determined as the 100%

aggregation, that was also used as baseline (0% inhibition), by adding PAF at approximately  $1-5 \times 10^{-11}$  M final concentration in the cuvette for WRP and  $0.1-5 \times 10^{-8}$  M final concentration in the cuvette for rPRP or active thrombin at approximately 0.001-0.04 IU/mL for WRP and 0.05-0.1 IU/mL for rPRP in the cuvette. The PAF-induced/thrombin-induced aggregation was calculated first at this zero % inhibition baseline in a cuvette. Then, to assess the ability of each sample to inhibit PAF/Thrombin induced platelet aggregations, WRP or rPRP were pre-incubated -in different cuvettes- in the presence of a variety of concentrations of a tested sample, and after 1-2 min of this incubation the appropriate amount of PAF/thrombin (needed for maximum reversible platelet aggregation) was added in these cuvettes and the reduced aggregation was calculated. Consequently, a linear curve at the range of 20–80% inhibition against PAF-induced/thrombin-induced aggregation of hPRP to the concentrations of each sample was deduced. From this curve, the concentration ( $\mu$ M) of each sample that led to 50% of inhibition of rabbit platelet aggregation induced by PAF or thrombin in WRP or rPRP suspensions of 0.250 mL, was calculated as the 50% inhibitory concentration value (i.e.,  $IC_{50}$ ) for each sample. The resulting  $IC_{50}$  values were expressed as a mean value of the concentration of each compound ( $\mu$ M) in the aggregometer cuvette  $\pm$  standard deviation.

## References

- [1]. Tsoupras, A.B., Papakyriakou, A.; Demopoulos, A.C.; Philippopoulos, A.I. Synthesis, biochemical evaluation and molecular modeling studies of novel rhodium complexes with nanomolar activity against Platelet Activating Factor. *J. Inorg. Biochem.* **2013**, *120*, 63-73. doi.org/10.1016/J.JINORGBIO.2012.12.004.
